# Supplementary material
Source: publisher figshare collection journal article supplement (https://frontiersin.figshare.com/ndownloader/files/31321141)
Supplement: Supplementary file 1 [file 31321141]

**Table S2.** Parameters of the rate of change of stomatal conductance as a function of ψ ([*b*]=mmol m-2 s-1 MPa-1), *VPD* ([*β*]=mmol m-2 s-1 kPa-1) and *PAR* ([*B*]=mmol µmol-1) (r2 is the coefficient of determination) for 15 tree species from Mexico City’s urban forest.

| **Species** | **Ψ** | | ***VPD*** | | ***PAR*** | |
| --- | --- | --- | --- | --- | --- | --- |
| ***b*** | **r2** | ***β*** | **r2** | ***B*** | **r2** |
| *Acacia longifolia* | -153.39 | 0.95 | 384.60 | 0.98 | 30.01 | 0.97 |
| *Acer negundo* | -180.52 | 0.97 | 548.52 | 0.97 | 25.51 | 0.94 |
| *Alnus acuminata* | -256.04 | 0.98 | 411.38 | 0.97 | 35.82 | 0.93 |
| *Buddleja cordata* | -43.10 | 0.96 | 136.01 | 0.92 | 40.21 | 0.91 |
| *Celtis occidentalis* | -216.67 | 0.97 | 927.66 | 0.98 | 20.15 | 0.89 |
| *Dodonaea viscosa* | -55.67 | 0.92 | 141.91 | 0.96 | 38.51 | 0.95 |
| *Eucaliptus camaldulensis* | -272.59 | 0.95 | 415.73 | 0.98 | 32.74 | 0.94 |
| *Erythrinia americana* | -212.44 | 0.98 | 477.12 | 0.94 | 26.84 | 0.98 |
| *Fraxinus uhdei* | -191.30 | 0.96 | 1001.61 | 0.98 | 8.67 | 0.95 |
| *Ligustrum lucidum* | -331.03 | 0.93 | 982.63 | 0.99 | 2.08 | 0.92 |
| *Liquidambar styraciflua* | -321.70 | 0.95 | 942.02 | 0.96 | 35.09 | 0.95 |
| *Populus alba* | -196.15 | 0.94 | 509.06 | 0.98 | 28.45 | 0.93 |
| *Populus deltoides* | -209.57 | 0.97 | 1367.42 | 0.99 | 26.42 | 0.95 |
| *Quercus rugosa* | -227.99 | 0.95 | 314.38 | 0.99 | 22.34 | 0.95 |
| *Ulmus parvifolia* | -112.99 | 0.94 | 331.31 | 0.98 | 10.48 | 0.97 |
